# Supplementary material for: Nandrolone induces a stem cell-like phenotype in human hepatocarcinoma-derived cell line inhibiting mitochondrial respiratory activity
Source: PubMed Central journal article supplement (PMC7010785; doi:10.1038/s41598-020-58871-1), 2020-02-10
Supplement: 41598_2020_58871_MOESM1_ESM.pdf [file 41598_2020_58871_MOESM1_ESM.pdf]

## Supplementary Information

### **Nandrolone induces a stem cell-like phenotype in human hepatocarcinoma-derived cell line inhibiting mitochondrial respiratory activity**

**Francesca Agriesti<sup>1</sup>, Tiziana Tataranni<sup>1</sup>, Consiglia Pacelli<sup>2</sup>, Rosella Scrima<sup>2</sup>, Ilaria Laurenzana<sup>1</sup>, Vitalba Ruggieri<sup>1</sup>, Olga Cela<sup>2</sup>, Carmela Mazzoccoli<sup>1</sup>, Monica Salerno<sup>3</sup>, Francesco Sessa<sup>2</sup>, Gabriele Sani<sup>4,5,6</sup>, Cristoforo Pomara<sup>3</sup>, Nazzareno Capitanio<sup>2</sup>, Claudia Piccoli<sup>\*1,2</sup>**

<sup>1</sup> Laboratory of Pre-Clinical and Translational Research, IRCCS-CROB, Referral Cancer Center of Basilicata, 85028 Rionero in Vulture, Italy. <sup>2</sup> Department of Clinical and Experimental Medicine, University of Foggia, via L. Pinto c/o OO.RR., 71100 Foggia, Italy. <sup>3</sup> Department of Medical, Surgical Sciences and Advanced Technologies "G.F. Ingrassia", University of Catania – A.O.U. "Policlinico - V. Emanuele" (via S. Sofia, 87 – Sector 10, Building B – 95123) Catania, Italy. <sup>4</sup> NESMOS Department (Neurosciences, Mental Health, and Sensory Organs), Sapienza University of Rome, Italy. <sup>5</sup> School of Medicine and Psychology, Sant'Andrea Hospital, Rome, Italy. <sup>6</sup> Centro Lucio Bini, Rome, Italy.

**Francesca Agriesti ORCID:** <https://orcid.org/0000-0001-8911-7691>

#### **\*Corresponding author:**

Claudia Piccoli, Department of Clinical and Experimental Medicine,  
University of Foggia,

via L. Pinto c/o OO.RR., 71100 Foggia, Italy.

e-mail: [claudia.piccoli@unifg.it](mailto:claudia.piccoli@unifg.it)

Phone number: +39 0881 588060

Fax number: +39 0972 723509

ORCID: <https://orcid.org/0000-0001-9739-4680>

Supplementary Figure S1. Full-length blots of Figure 2B

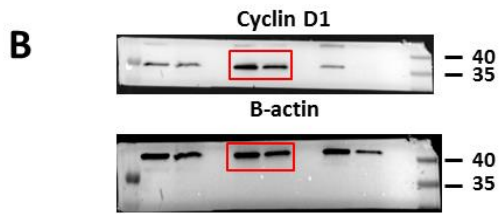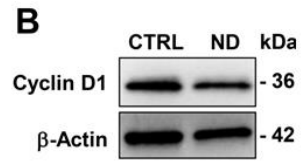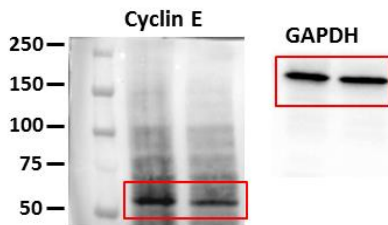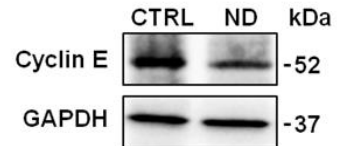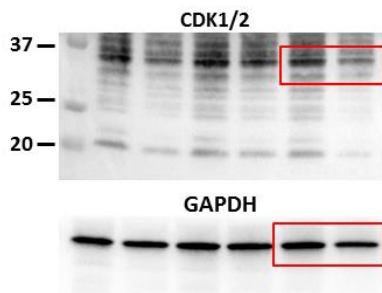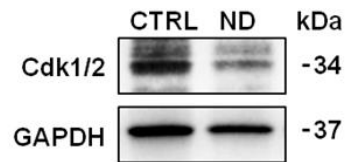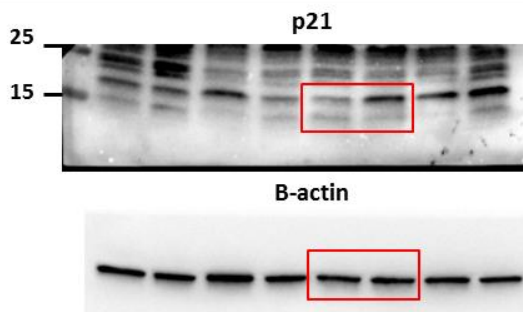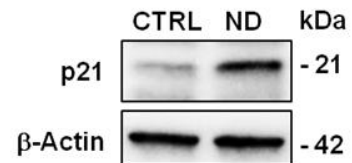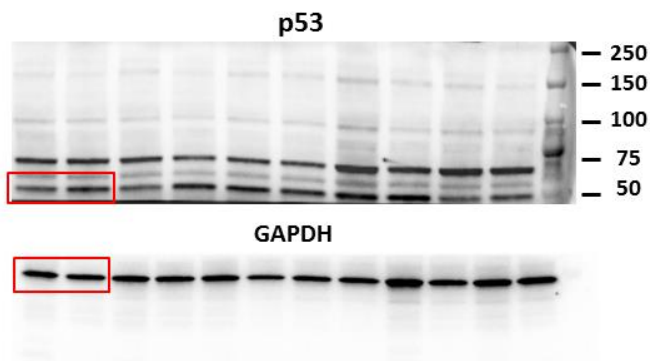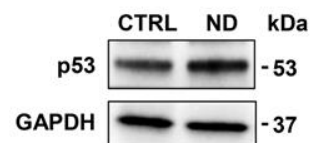

**Supplementary Figure S2.** Effect of nandrolone treatment on lactate production in HepG2 cells. The bars are average  $\pm$  SEM of three independent experiment. See Materials and Methods for details.

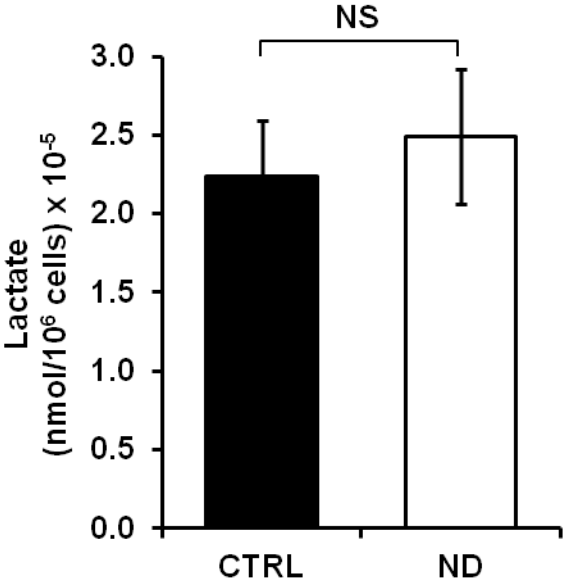

Supplementary Figure S3. Full-length blots of Figure 4B

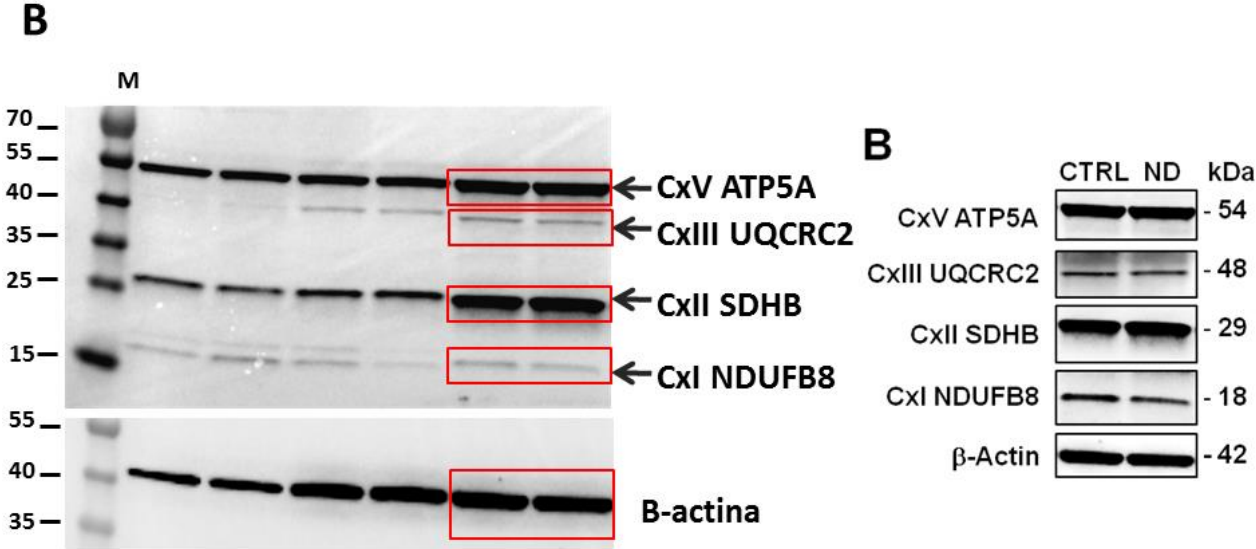

**Supplementary Figure S4.** Evaluation of Nandrolone effect on the kinetic parameters of Ubiquinone:cytochrome c oxidoreductase (CxIII). Left graph: Lineweaver-Burk (L/B) plot illustrating inhibition of CxIII inhibition tested (in absence or) in the presence of different concentrations of ND as follows: 160  $\mu\text{M}$  (○), 80  $\mu\text{M}$  (▲), 40  $\mu\text{M}$  (■). Graph on the right: secondary plot of slope against [ND] to determine the  $K_i$  (303  $\mu\text{M}$ ). The inhibition is competitive and the slopes were calculated from the L/B plot. CxIII activity was assayed in mitochondria isolated from beef heart by differential centrifugation as previously described [Srima R. et al. Plos One 12, e0188683 (2017)]. Mitochondria (1.0 mg prot/ml) were suspended in 0.25 M sucrose, 5 mM Hepes, 1 mM EDTA, 5 mM  $\text{MgCl}_2$  and the kinetic parameters of CxIII were assessed spectrophotometrically (in the presence of 1.0  $\mu\text{g/ml}$  rotenone *plus* 2 mM KCN) by following the initial rate of 50  $\mu\text{M}$  ferri-cytochrome c reduction ( $\epsilon_{550\text{nm}} = 21.1 \text{ mM}^{-1} \text{ cm}^{-1}$ ) elicited by graded concentrations of dUQH<sub>2</sub> (20, 50, 100, 200, 300  $\mu\text{M}$ ) as electron donor in the absence or presence of graded concentrations of nandrolone (40, 80, 160,  $\mu\text{M}$ ). The rates were corrected for the residual cytochrome c reduction in the presence of 1  $\mu\text{g/ml}$  antimycin A. The attained data points were plotted as double reciprocal plot and Dixon plot and linearly fitted by least square analysis using EnzFitter (Biosoft).

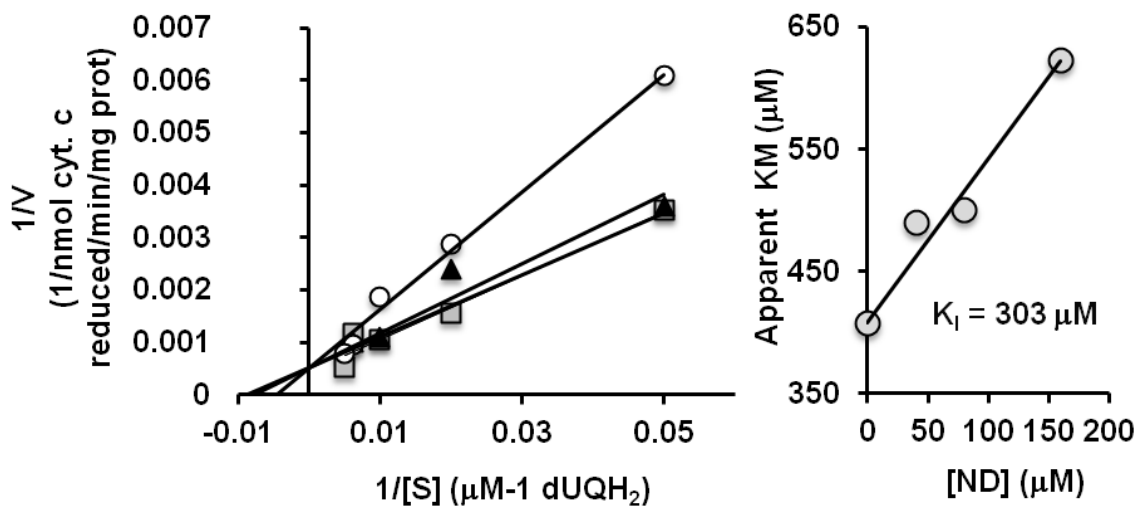

**Supplementary Figure S5.** Effect of nandrolone treatment (ND) on the expression of the housekeeping gene GAPDH in HepG2 cells and derived spheroids. Bars in the histogram are averages  $\pm$  SD of at least 6 independent assays under each condition and show the cycle threshold (Ct) of the RT-PCR analysis of the GAPDH expression (see Materials and Methods of the main text and Supplementary Table 1 for details). Black bars show the effect on cultured HepG2 cells of 72 h treatment with vehicle (ethanol) or 80  $\mu$ M nandrolone. White bars show the effect of nandrolone on forming spheroid with 80  $\mu$ M of the drug supplemented to the cell suspension at the beginning of the spheroid formation protocol (see Materials and Methods of the main text for details) and assessed after 72 h.

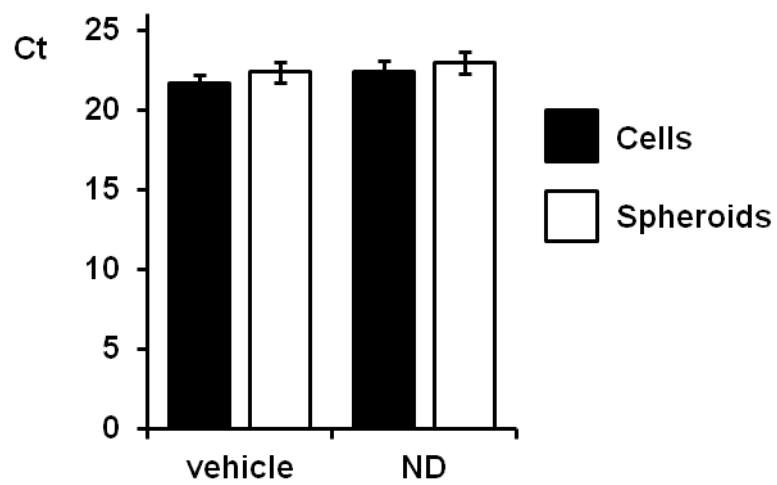

**Supplementary Table 1.** Features of the primers used for real-time polymerase chain reaction

| <b>Gene</b> | <b>Organism</b>      | <b>T<sub>ann</sub> (°C)</b> | <b>Length (bp)</b> | <b>NCBI Ref Seq or sequence</b>                             |
|-------------|----------------------|-----------------------------|--------------------|-------------------------------------------------------------|
| Nanog       | Mouse (Mus musculus) | 55                          | 114                | NM_028016                                                   |
| Nestin      | Mouse (Mus musculus) | 60                          | 81                 | NM_016701                                                   |
| Myc         | Mouse (Mus musculus) | 60                          | 60                 | NM_001177352                                                |
| Lin28       | Mouse (Mus musculus) | 55                          | 116                | NM_145833                                                   |
| Sox17       | Mouse (Mus musculus) | 60                          | 77                 | NM_011441                                                   |
| Klf4        | Mouse (Mus musculus) | 60                          | 66                 | NM_010637                                                   |
| Rn18S       | Mouse (Mus musculus) | 60                          | 97                 | Forward: acaggattgacagattga<br>Reverse: tatcggaattaaccagaca |
| Nanog       | Homo sapiens         | 55                          | 90                 | NM_024865                                                   |
| Myc         | Homo sapiens         | 60                          | 129                | NM_002467                                                   |
| Lin28       | Homo sapiens         | 55                          | 126                | NM_024674                                                   |
| Sox2        | Homo sapiens         | 60                          | 64                 | NM_003106                                                   |
| Klf4        | Homo sapiens         | 60                          | 72                 | NM_004235                                                   |
| Gapdh       | Homo sapiens         | 60                          | 135                | Forward: aggctgagaacgggaagc<br>Reverse: ccatggtggtgaagacg   |
